# Supplementary material
Source: PubMed Central journal article supplement (PMC7415576)

Full Western blots associated with Extended Data Figure 6b

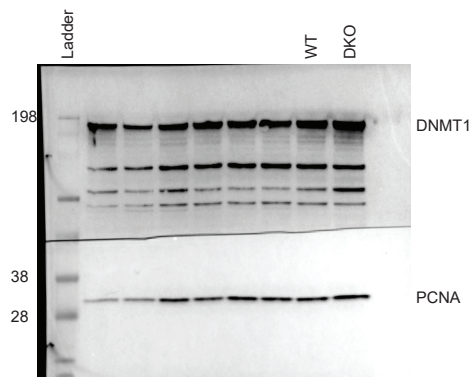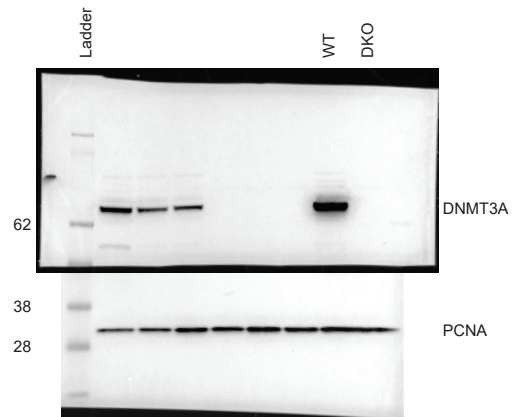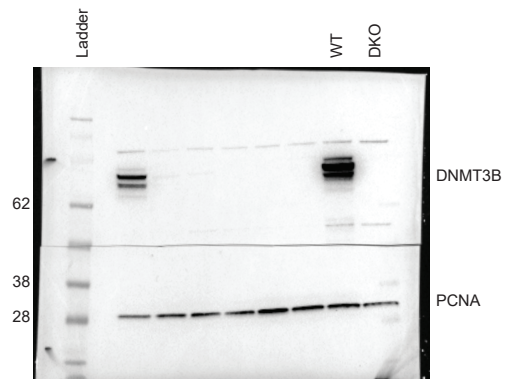

Supplement: NIHMS1589973-supplement-1589973_Source_Dat_Fig_2.pdf [file NIHMS1589973-supplement-1589973_Source_Dat_Fig_2.pdf]

Full Western blots associated with Extended Data Figure 8b

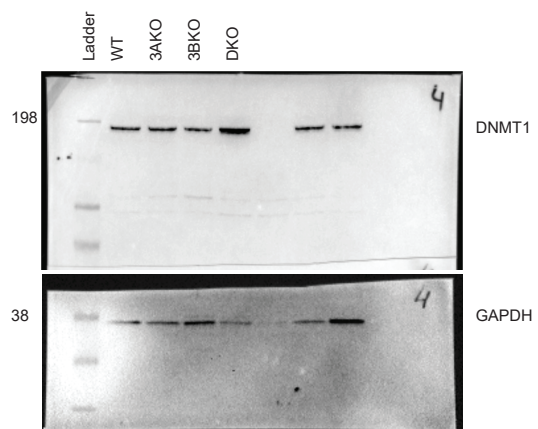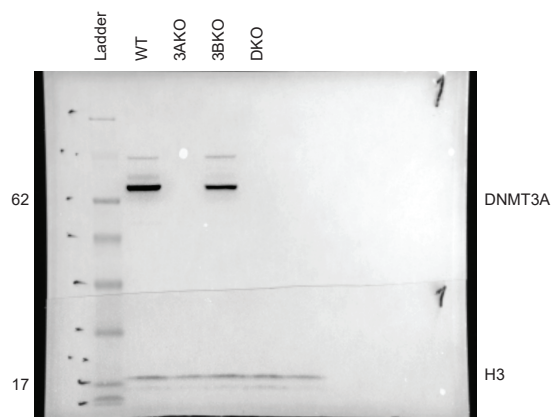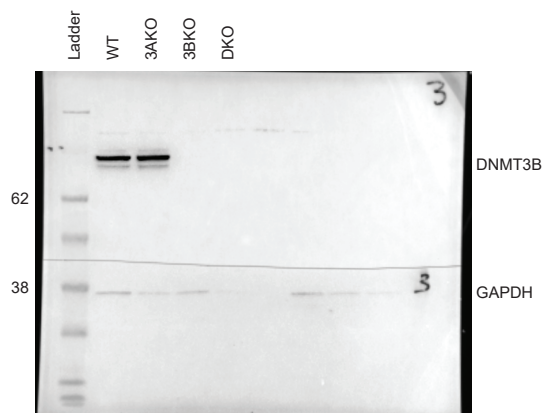

Supplement: NIHMS1589973-supplement-1589973_Source_Dat_Fig_3.pdf [file NIHMS1589973-supplement-1589973_Source_Dat_Fig_3.pdf]
